# Supplementary material
Source: MDPI journal article supplement (https://www.mdpi.com/2073-4433/11/7/692)
Supplement: s1 [file s1]

1 *Type of the Paper (Article)*

2 **Damaging convective and non-convective winds in southwestern Iberia during**  
3 **Windstorm Xola**

4

5 **Paulo Pinto**<sup>1,†</sup>, and **Margarida Belo-Pereira**<sup>1,2,†,\*</sup>

6 1 Meteorology and Geophysics Department, Portuguese Institute for Sea and Atmosphere (IPMA), Portugal

7 2 Center for the Research and Technology of Agro-Environmental and Biological Sciences (CITAB),

8 University of Trás-os-Montes and Alto Douro, 5001-801 Vila Real, Portugal

9 <sup>†</sup> These authors contributed equally to this work.

10 \* Correspondence: IPMA, Rua C ao Aeroporto, 1749-077 Lisboa, margarida.belo@ipma.pt

11 Received: 30 May 2020; Accepted: 26 June 2020, Published: 30 June 2020

12

13

14

15

16

17

18

**Supplementary Material**

19

20

21

22

23

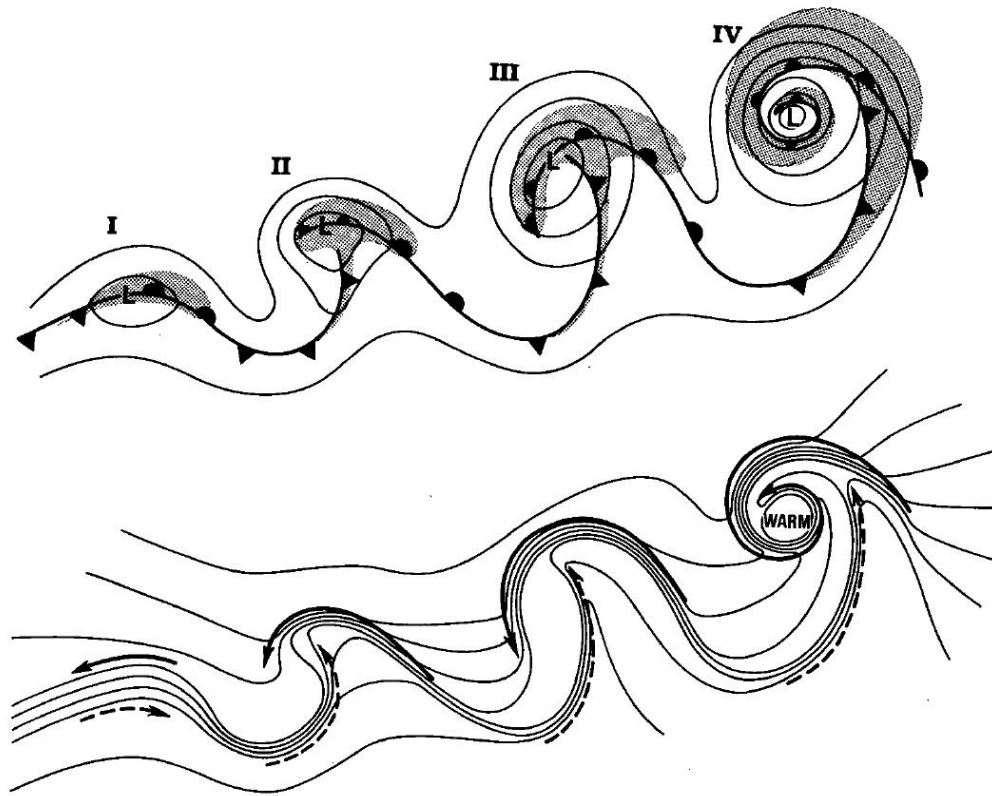

24 **Figure S1.** Shapiro-Keyser conceptual model: incipient frontal cyclone (I); frontal fracture (II),  
 25 frontal T bone and bent-back front (III) and warm-core seclusion (IV). From Shapiro and Keyser [1].  
 26 Upper: Mean sea level pressure (solid), fronts (bold) and cloud signature (shaded). Bottom:  
 27 temperature (solid) and cold and warm air (solid and dashed arrows, respectively).

28

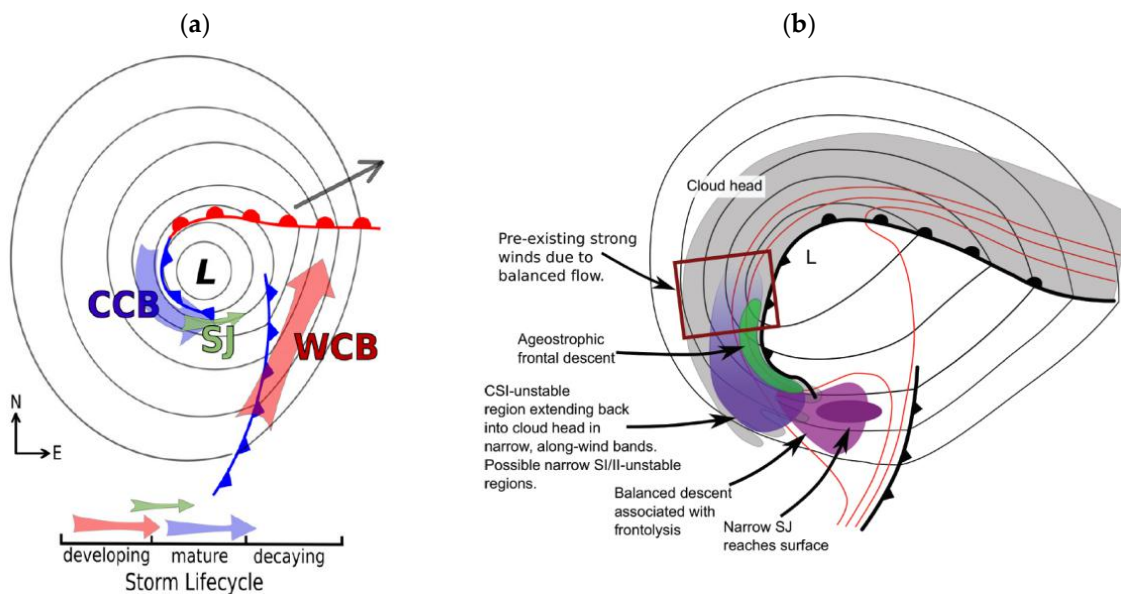

29 **Figure S2.** Conceptual model of sting jet: (a) Model presented by Hart *et al.* [20], showing the cold front,  
 30 the bent-back front, the Cold Conveyor Belt (CCB), Warm Conveyor Belt (WCB) and the sting jet (SJ). (b)  
 31 Model presented by Clark and Gray [14], explaining the mechanisms involved in the sting jet formation.

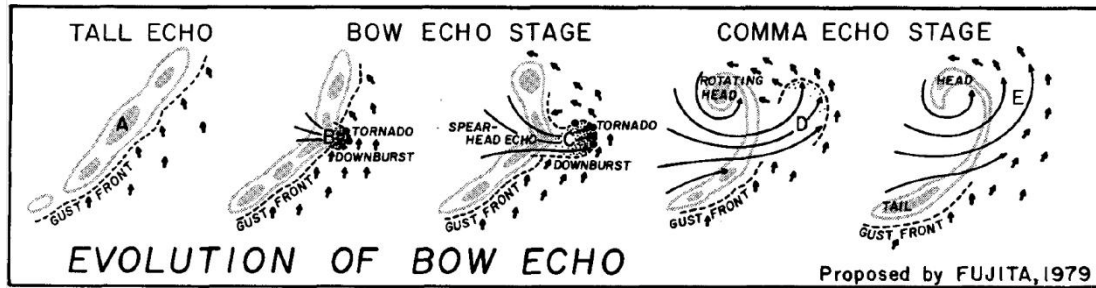

32

33 **Figure S3.** Evolution of bow echo proposed by Fujita. In this model a downburst thunderstorm produces a  
 34 bow echo. In the comma echo stage (stages D and E), the downburst winds weaken and induces a mesoscale  
 35 circulation, which distorts the initial line echo into a comma-shaped echo with a rotating head. From Fujita  
 36 [27].

37

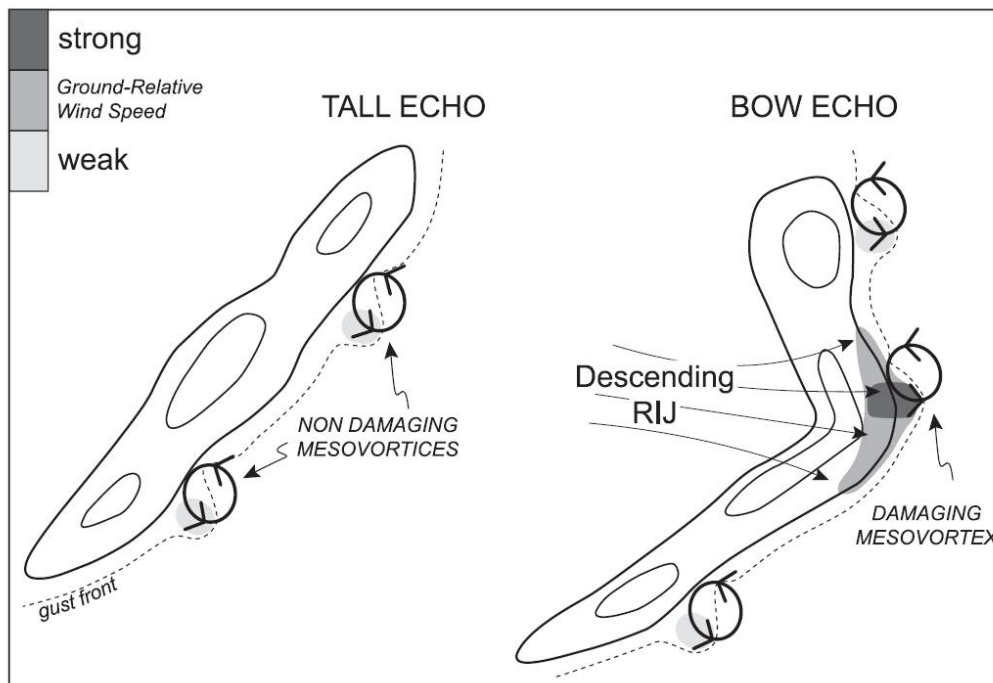

38

39 **Figure S4.** Schematic diagram illustrating damaging and non-damaging mesovortices formed within a bow  
 40 echo. From Atkins and St. Laurent [36], the dark shading shows where damaging winds are found as a result  
 41 of the superposition of the RIJ and the mesovortex flow.

42

43

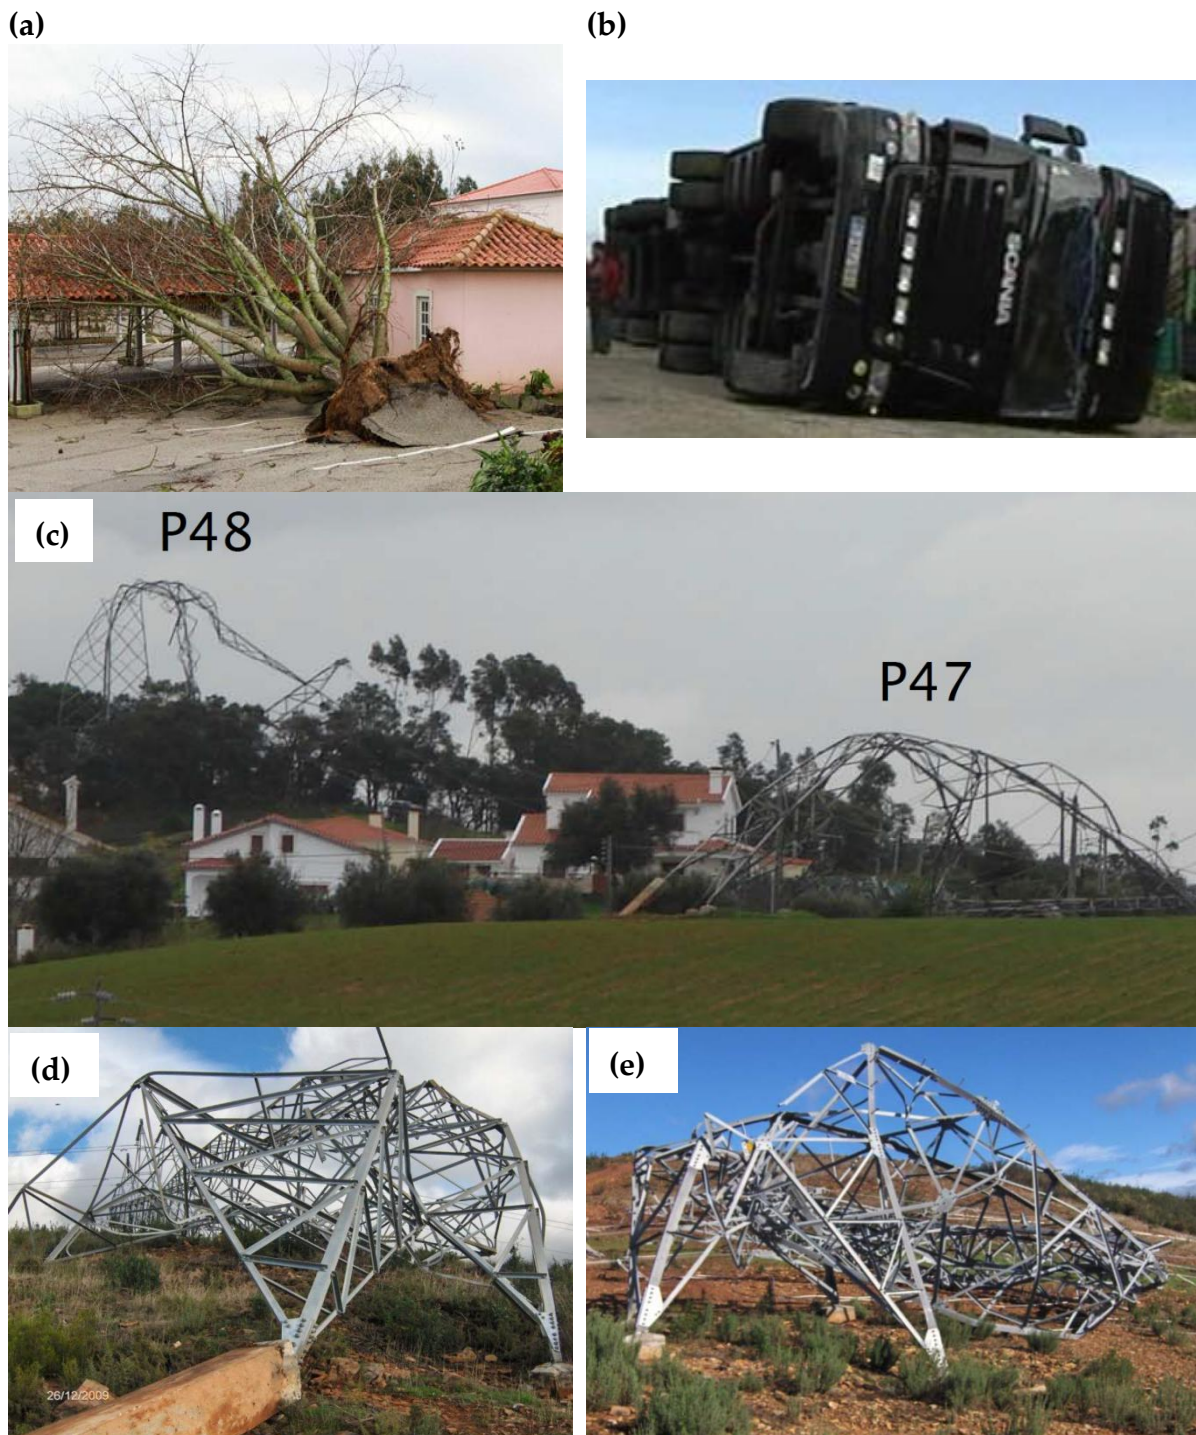

44 **Figure S5.** (a)-(d) Damages in the Oeste region. (a) Uprooted tree, (b) Large vehicle overturned, (c) Two power  
 45 towers (P47, P48) destroyed with houses in between. (d) Power tower destroyed including snapped out  
 46 concrete foundation; (e) Power tower destroyed near Portimão (see locations of Oeste region and Portimão in  
 47 Figure 1d).

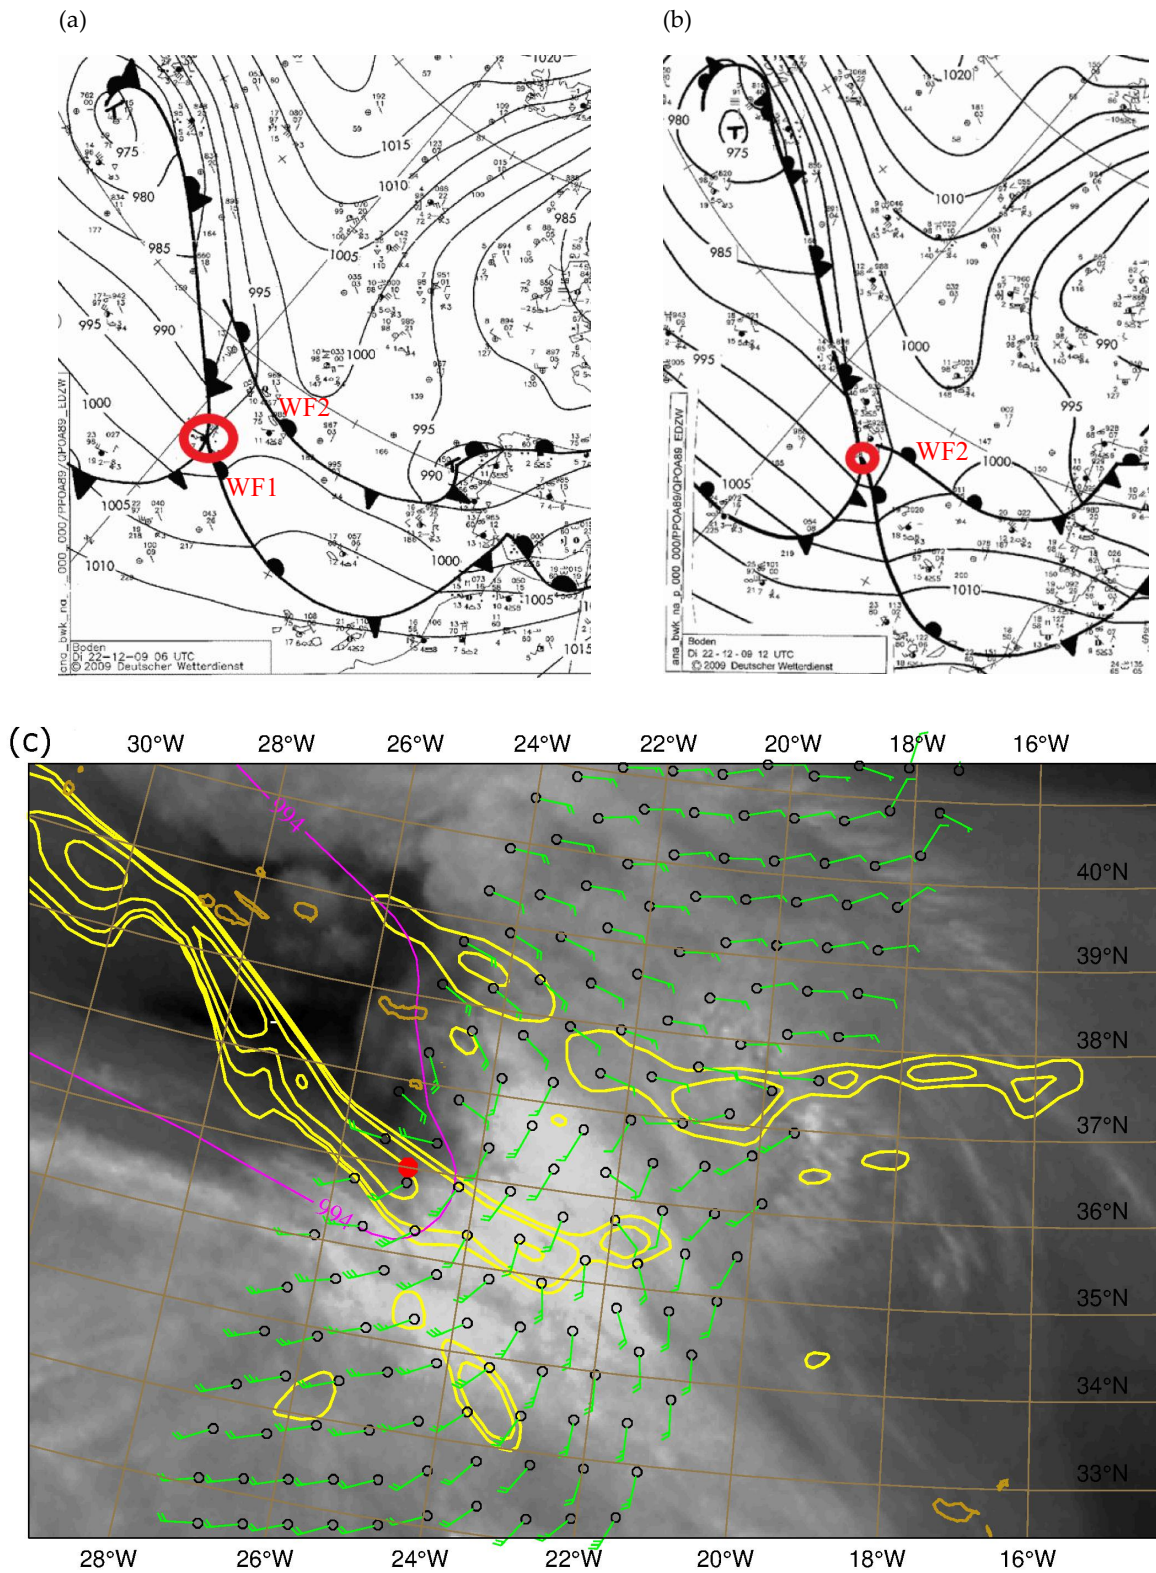

50 **Figure S6.** Surface synoptic analysis from Deutscher Wetterdienst (a) 0600UTC and (b) 1200UTC on  
 51 22/12/2009. The triple point (i.e., the junction between the occluded, cold, and warm fronts) of an  
 52 occluded extratropical cyclone is marked by a red circle. The windstorm Xola formed southeast of this  
 53 triple point, over the warm front, labelled WF1. (c) MSG WV6.2 image (at 1115UTC) superimposed with  
 54 ASCAT winds at 1120UTC and TFP at 925hPa ( $^{\circ}\text{C}/(100\text{km})^2$ , yellow lines) at 1200UTC. The MSLP isobar  
 55 of 994hPa is also shown with a magenta line.

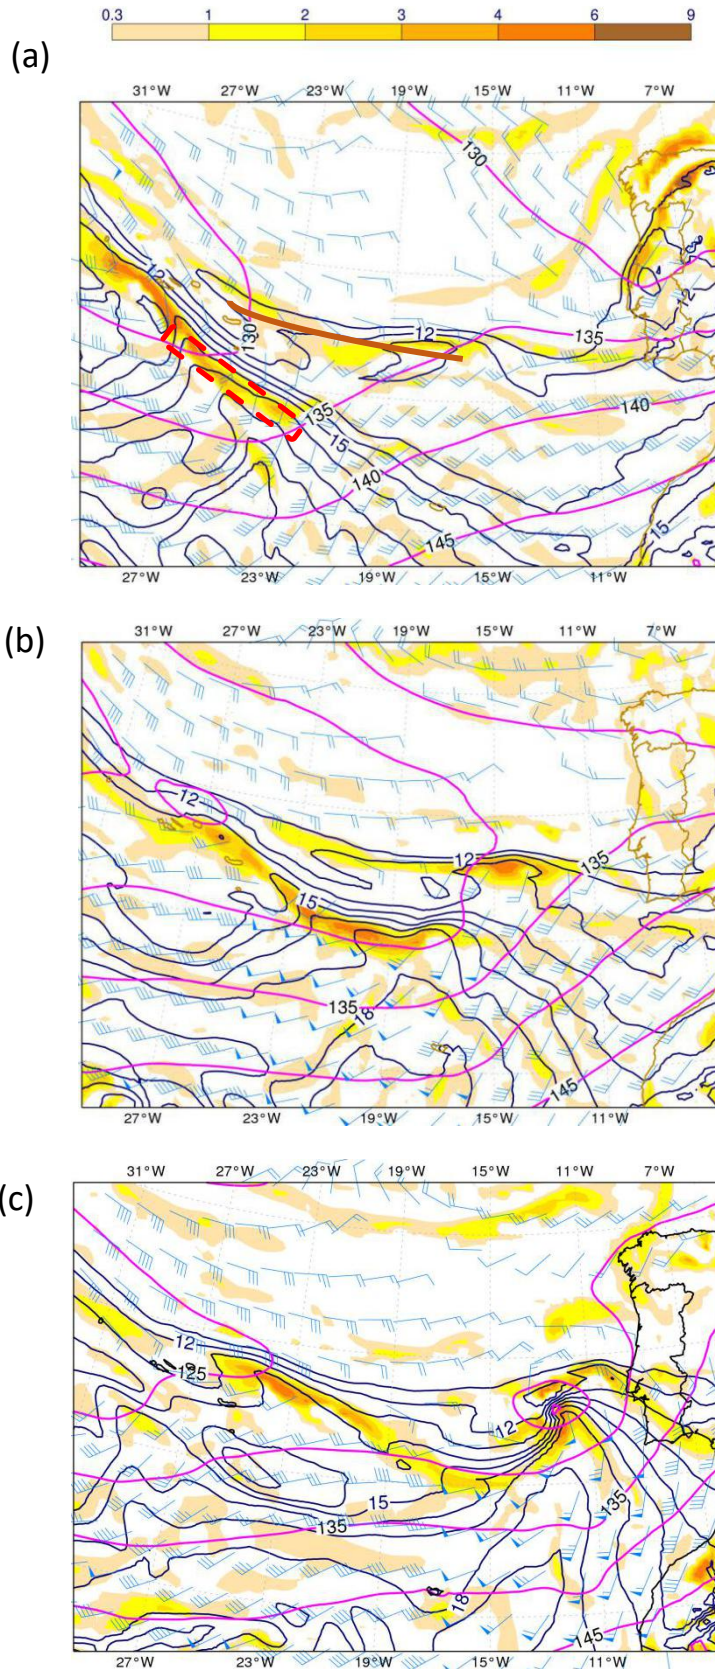

56

57

58

59 **Figure S7.** ECMWF analyses valid at (a) 1200UTC, (b) 1800UTC on 22/12/2009 and (c) 0000UTC on  
 60 23/12/2009. Wind (blue barsbs), TFP (shaded, °C/(100km)<sup>2</sup>) and wet-bulb potential temperature (1°C  
 61 intervals, from 11 to 19°C in black lines) at 925hPa; Geopotential height (5 dam intervals, magenta  
 62 lines) at 850hPa. In (a) the warm front WF1 is marked with dashed red rectangle and the warm front  
 63 WF2 is marked with a brown thick line.

64

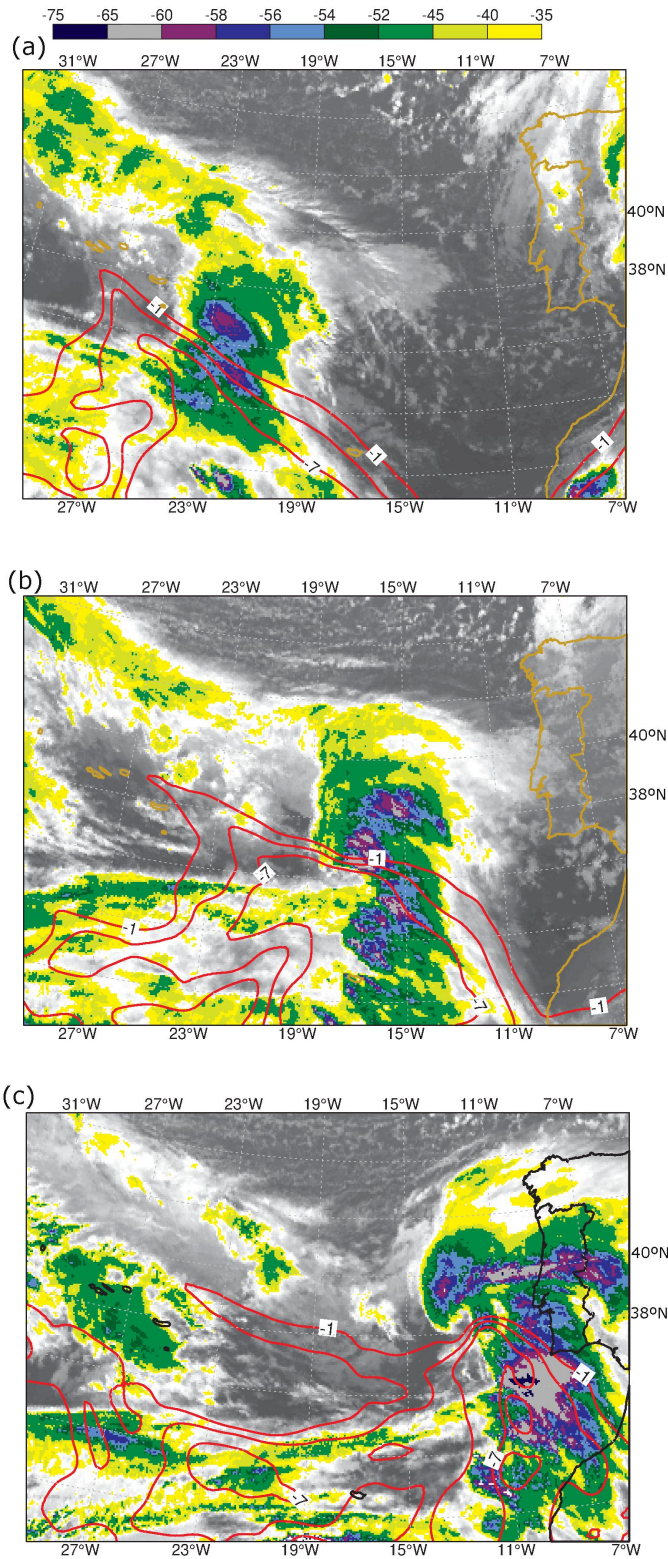

65

66

67

68

69

70

**Figure S8.** IR10.8 brightness temperature (shaded from -35 to -75°C) superimposed with PI (-1,-4 and -7°C in red lines) for **(a)** 1200UTC, **(b)** 1800UTC on 22/12/2009, and **(c)** 0000UTC on 23/12/2009. See definition of PI in section 2.3.2.

71

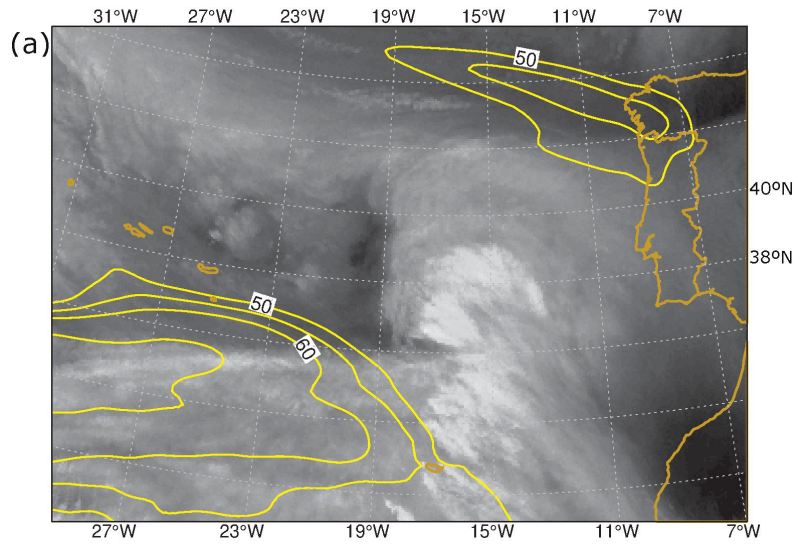

72

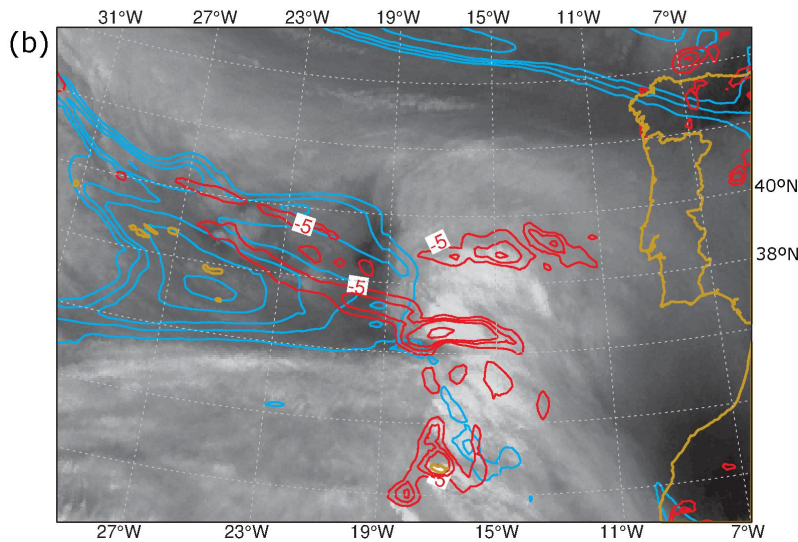

73

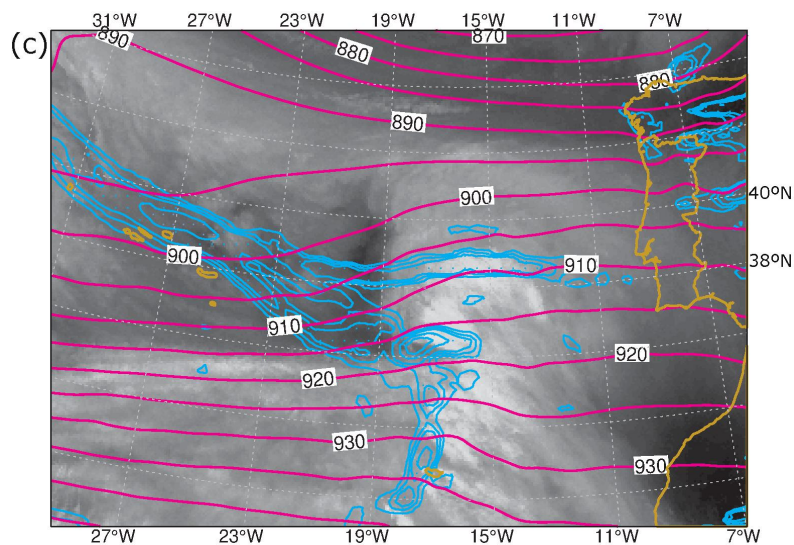

74

75

76

77

**Figure S9.** MSG WV6.2 image at 1800UTC on 22/12/2009 superimposed with (a) wind speed at 300hPa (50, 55, 60 and 70 m s<sup>-1</sup>, yellow lines); (b) convergence at 850hPa (-5, -10, -15, -30, -50×10<sup>-5</sup>s<sup>-1</sup>, red lines) and potential vorticity at 300hPa (1, 1.5, 2, 3, 4 PVU, cyan lines), (c) Geopotential height at 300hPa (5 dam intervals, blue lines) and relative vorticity at 850hPa (5, 10, 15, 30×10<sup>-5</sup>s<sup>-1</sup>, blue lines).



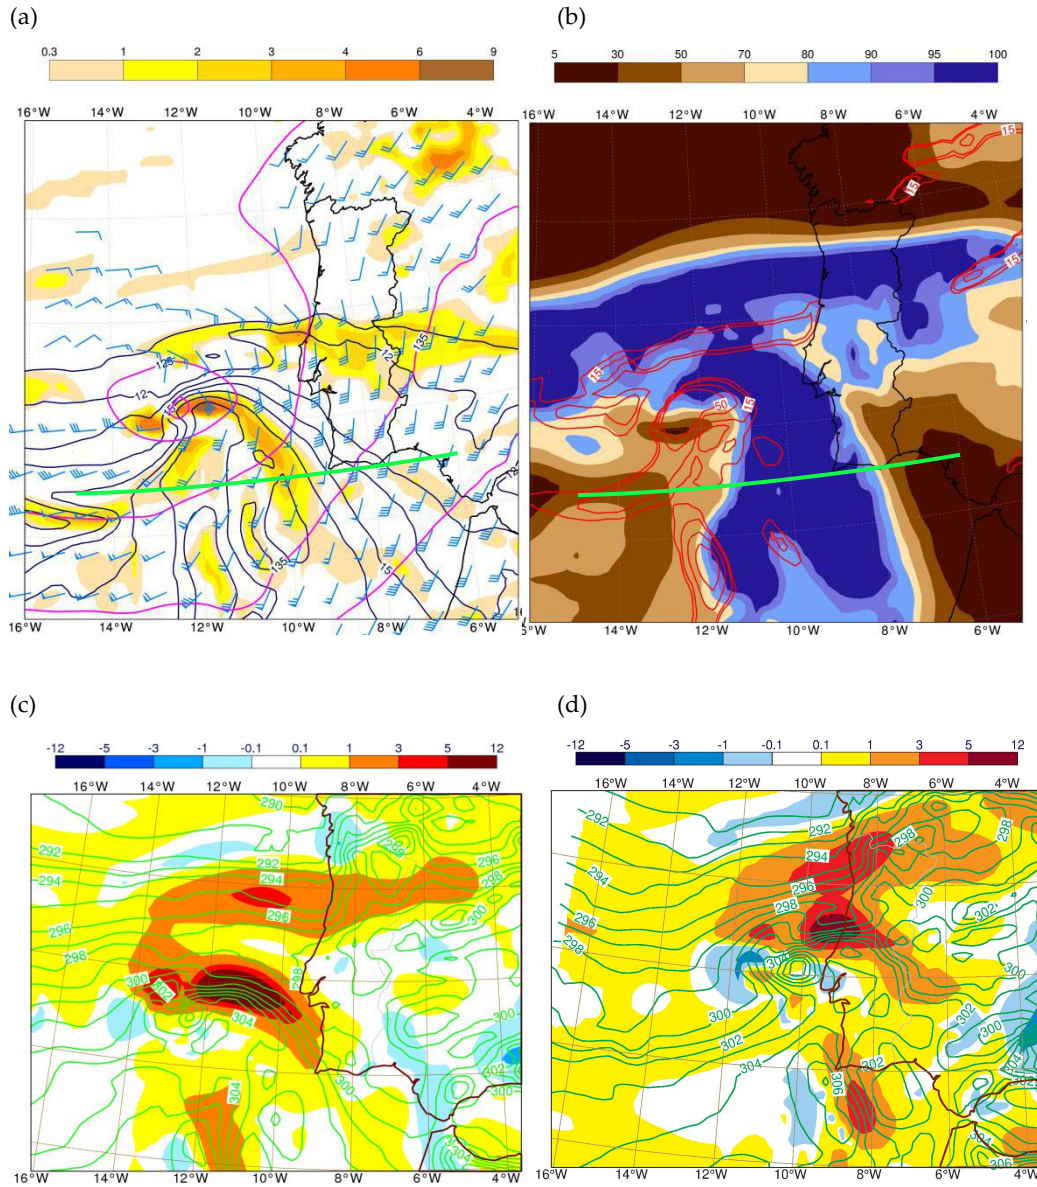

78

79

80 **Figure S10.** ECMWF analyses at 0000UTC on 23/12/2009. **(a)** Geopotential height (5 dam intervals,  
 81 magenta lines), wind (blue barsbs),  $\theta_w$  (1°C intervals, from 11 to 18°C in black lines) and TFP  
 82 ( $^{\circ}\text{C}/(100\text{km})^2$ , shaded) at 850hPa. **(b)** Relative humidity (shaded) and relative vorticity (5, 10, 15, 30,  
 83  $50 \times 10^{-5} \text{s}^{-1}$ , red lines). The green line marks the cross-section that will be represented in Figure S12.  
 84 Petterssen's Frontogenesis ( $10^{-9} \text{K m}^{-1} \text{s}^{-1}$ , shaded) and potential temperature (1 K intervals, green  
 85 lines) at 800hPa, at **(c)** 0000UTC (ECMWF analysis) and **(d)** 0300UTC (ECMWF forecast) on  
 86 23/12/2009.

87

88

89

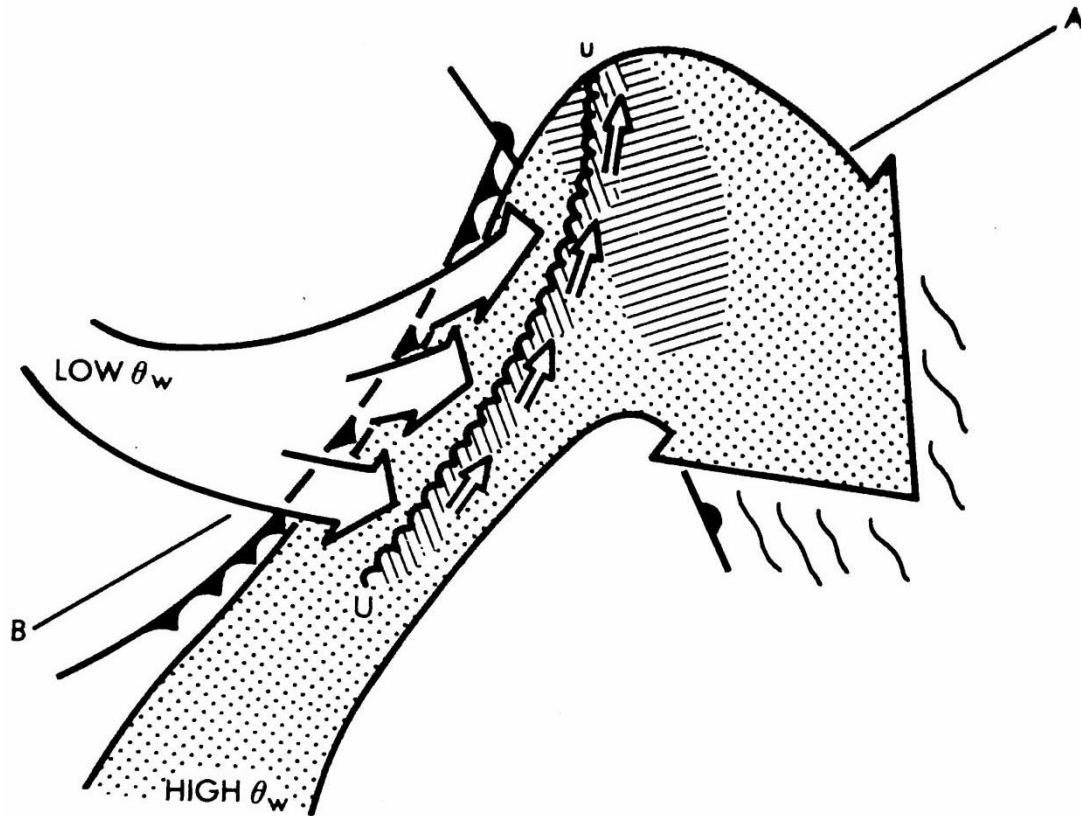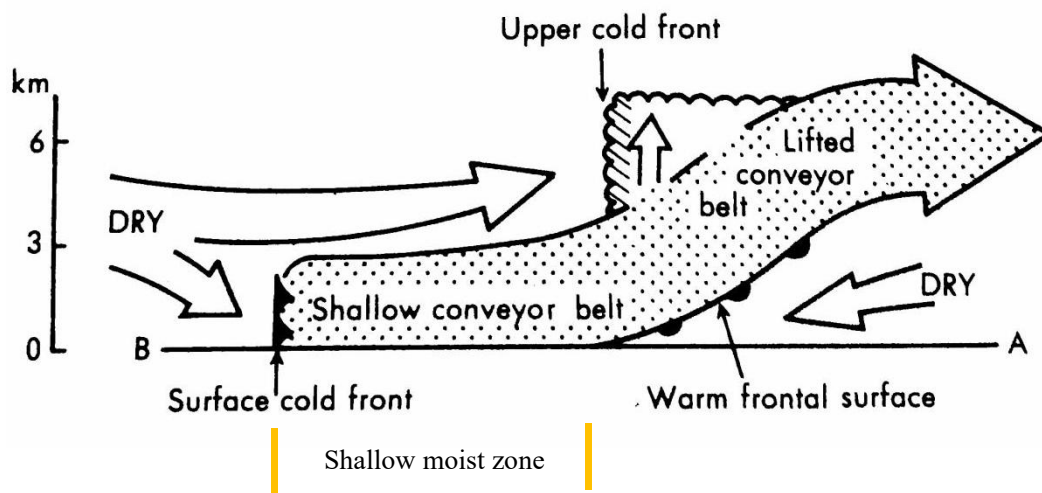

90

91

92 **Figure S11.** Idealized structure of a kata-cold front, also known as split cold front. (a) Plan view showing that  
 93 cold and dry air ( $\theta_w$ ) associated with the dry intrusion overrides moist and warm air in the warm conveyor  
 94 belt. The line UU represents the upper cold front (b) Vertical cross section along AB. The shallow moist zone is  
 95 characterized by the presence of low clouds and occurrence of mainly light precipitation. Outbreaks of deep  
 96 convection are expected in association to the upper cold front. Adapted from Browning and Monk [24].

97

98

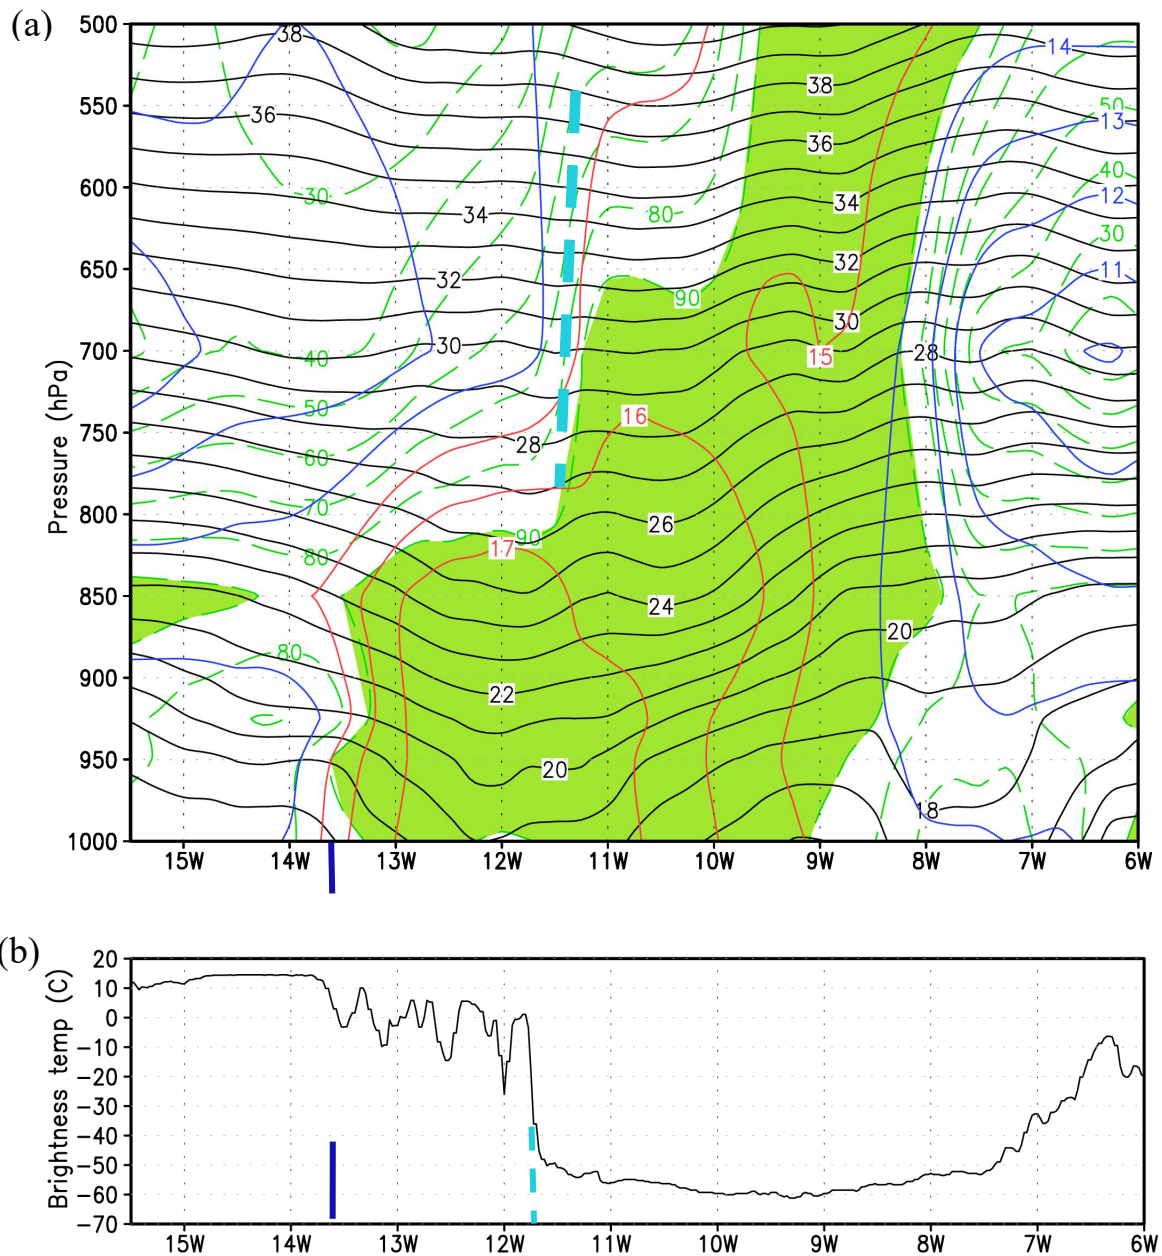

99 **Figure S12.** (a) Vertical cross-section along 37°N from 16°W to 6°W (green line marked in Figure S10) of  
 100 ECMWF analysis fields at 0000UTC on 23/12/2009. Wet-bulb potential temperature ( $\geq 15^\circ\text{C}$  in red,  $< 15^\circ\text{C}$  in  
 101 blue lines) and potential temperature ( $^\circ\text{C}$ , black solid lines) and relative humidity (green dashed lines from  
 102 30 to 90%, green shaded where  $\text{RH} \geq 90\%$ ). (b) Cross-section along along 37°N from 16°W to 6°W (green line  
 103 marked in Figure S10) of IR10.8 brightness temperature ( $^\circ\text{C}$ , black solid line). The vertical blue and dashed  
 104 cyan lines indicate the positions of the SCF and UCF, respectively.

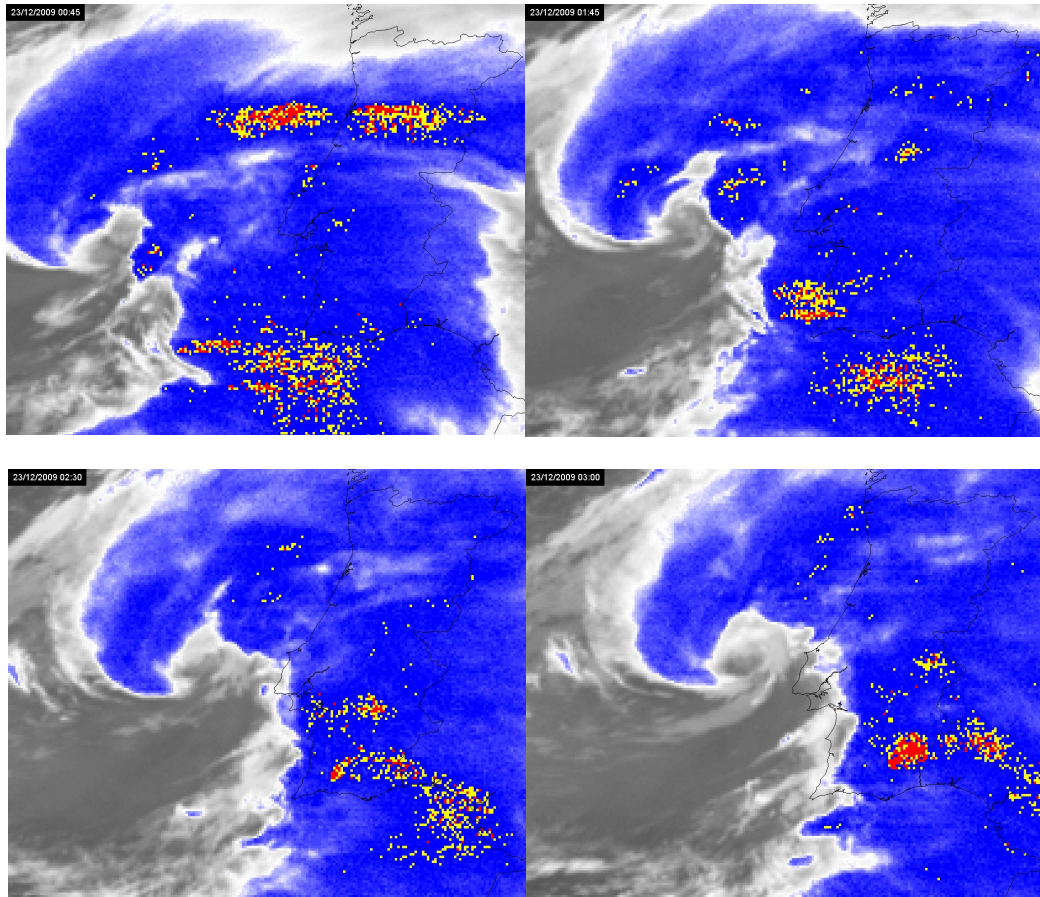

105

106

107 **Figure S13.** Overshooting top product (WV6.2 and IR10.8 BTD) at 0045UTC, 0145UTC, 0230UTC  
 108 and 0300UTC on 23/12/2009. The overshooting tops are identified by the yellow and red pixels.

109

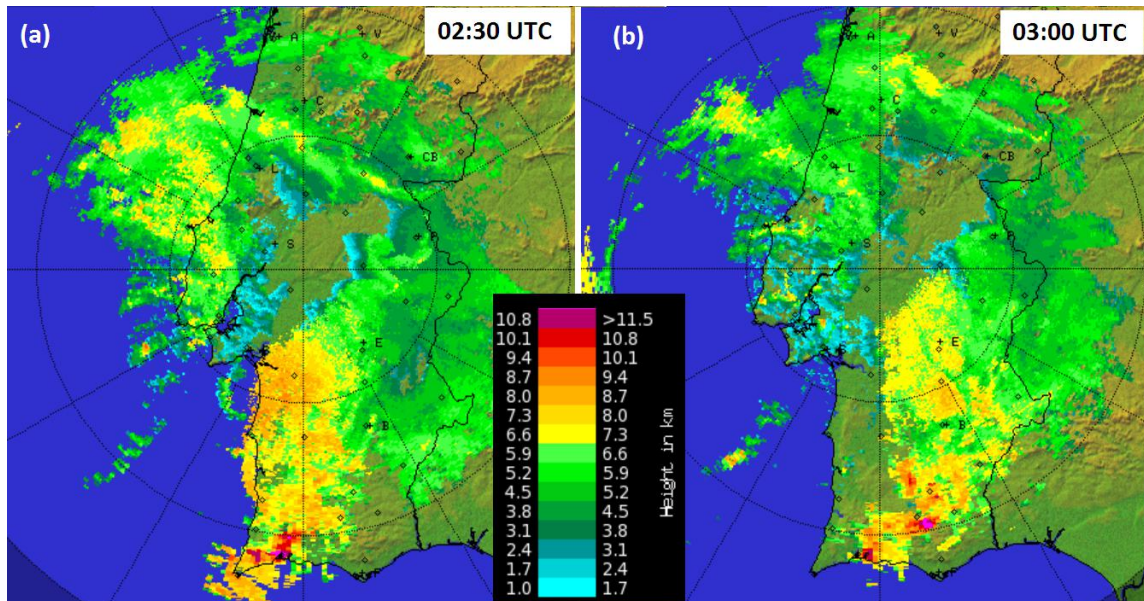

110

111 **Figure S14.** TOPS image from CL radar at (a) 0230 UTC and (b) 0300 UTC on 23/12/2009. Note that  
 112 the scale is different from that in Figure 11.

113

114

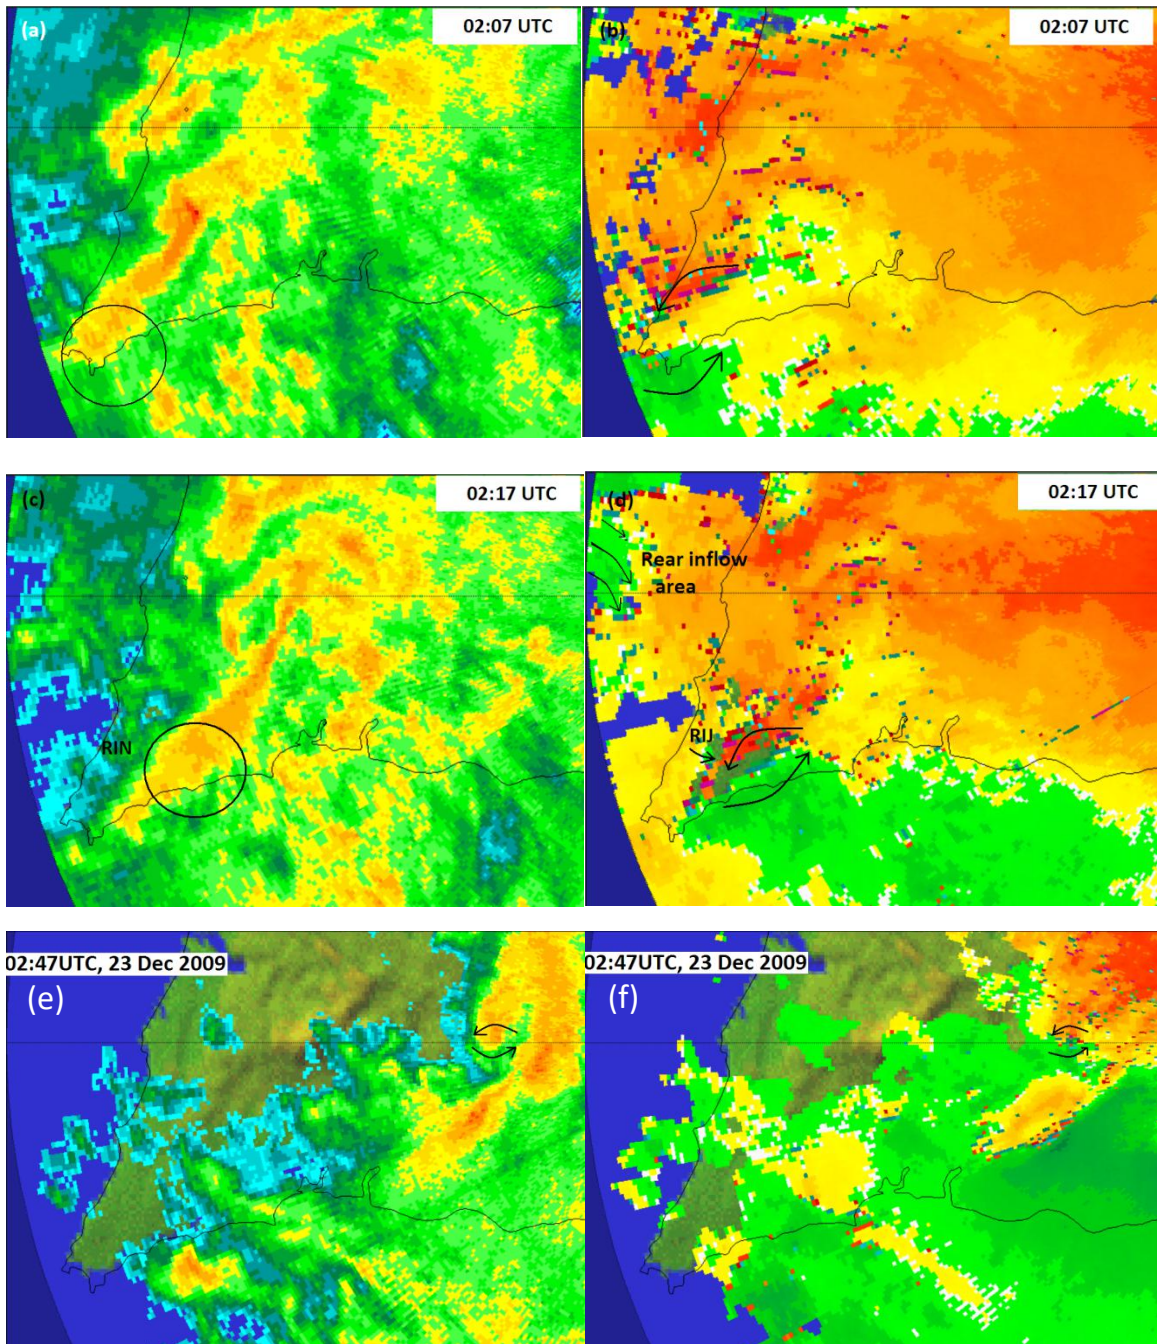

115

116

117

118 **Figure S15.** PPI at 1.5° elevation on the 23/12/2009. Radar reflectivity at (a) 0217 UTC, (c) 0227UTC and (e)  
 119 0247UTC. Storm-relative velocity at (b) 0217 UTC, (d) 0227UTC and (f) 0247UTC. Bow echo is marked with  
 120 oval and RIN signature are marked in (a, c); black circular arrows represent the approximate circulation of the  
 121 mesovortex and RIJ signature is marked when identified (b, d). Rear inflow area marked with black arrows in  
 122 (d). The average storm translation vector in the period 0200-0250 UTC was 36 ms<sup>-1</sup> from 234°. The scales are the  
 123 same as in Figure 8.

124

125 **Table S1.** InV and OutV are the maximum inbound (approaching the radar) and outbound storm-relative  
 126 velocities. V-diam is couplet diameter, defined by the distance between the pixels of InV and OutV. Az Shear is  
 127 the azimuthal shear, defined as the difference between OutV and InV normalized by V-diam. M-RotV is the  
 128 maximum rotational velocity (average magnitude of inbound and outbound velocities). Alt is the altitude at  
 129 which the rotation couplet is observed. Range is the distance between the couplet and the radar.

| <b>Time<br/>(UTC)<br/>(tilt °)</b> | <b>InV<br/>(m/s)</b> | <b>OutV<br/>(m/s)</b> | <b>V-diam<br/>(km)</b> | <b>Az Shear<br/>(<math>\times 10^{-3} \text{ s}^{-1}</math>)</b> | <b>M-RotV<br/>(m/s)</b> | <b>Alt (km)</b> | <b>Range<br/>(km)</b> |
|------------------------------------|----------------------|-----------------------|------------------------|------------------------------------------------------------------|-------------------------|-----------------|-----------------------|
| 0207<br>(1.5)                      | -9.45                | +24.8                 | 11.3                   | 3.0                                                              | 17.2                    | 3.5             | 91                    |
| 0217<br>(1.5)                      | -10.04               | +30.1                 | 11.2                   | 3.6                                                              | 20.0                    | 3.0             | 78                    |
| 0227<br>(0.1)                      | -5.91                | +20.67                | 3.4                    | 7.8                                                              | 13.3                    | 1.0             | 63                    |
| 0227<br>(1.5)                      | -8.27                | +27.76                | 4.6                    | 7.8                                                              | 18.0                    | 2.5             | 63                    |
| 0227<br>(4.0)                      | -13.58               | +17.13                | 8.4                    | 3.7                                                              | 15.4                    | 5.3             | 63                    |
| 0237<br>(0.1)                      | -25.98               | +23.0                 | 1.6                    | 30.6                                                             | 24.5                    | 0.8             | 48                    |
| 0237<br>(1.5)                      | -16.54               | 21.26                 | 5.0                    | 7.6                                                              | 18.9                    | 2.0             | 48                    |
| 0237<br>(4.0)                      | -21.85               | +14.17                | 1.5                    | 24.0                                                             | 18.0                    | 4.0             | 48                    |
| 0247<br>(0.1)                      | -11.81               | +23.6                 | 2.4                    | 14.8                                                             | 17.7                    | 0.7             | 33                    |
| 0247<br>(1.5)                      | -10.6                | +20.08                | 2.4                    | 13.1                                                             | 15.3                    | 1.6             | 33                    |
| 0247<br>(4.0)                      | -12.4                | +10.04                | 2.4                    | 9.4                                                              | 11.2                    | 3.0             | 33                    |

130

131

132

133

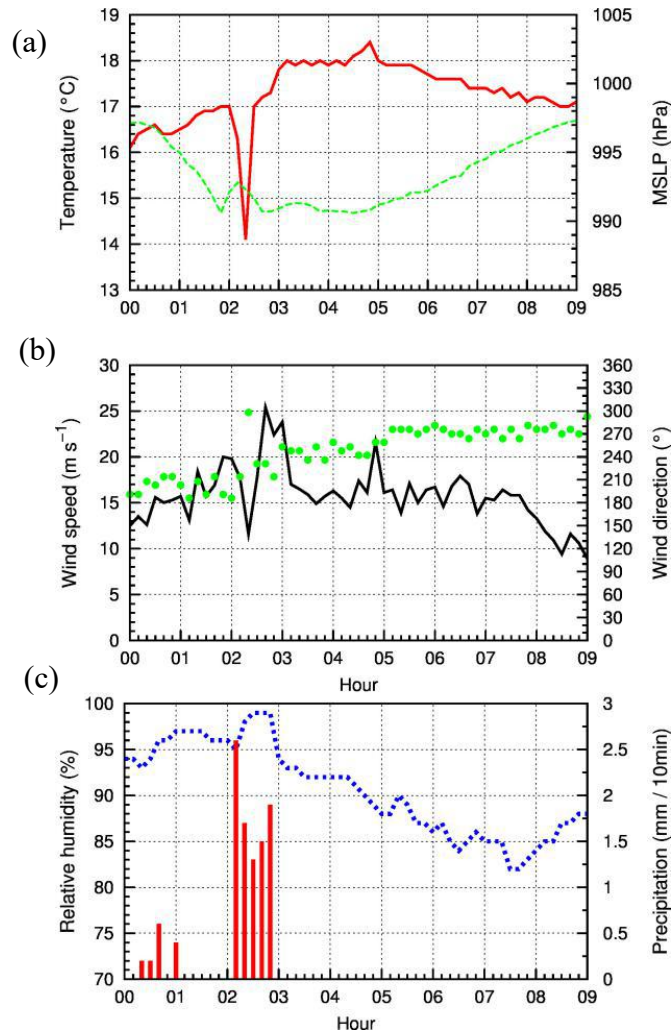

134

135 **Figure S16.** Time evolution of (a) 2 m temperature (red line) and MSLP, (b) wind gust (black line) and wind  
 136 direction at 10 m and (c) relative humidity (blue dashed line) and 10 minutes accumulated precipitation at  
 137 Sagres station, on 23/12/2009 (see its location in Figure 1d).

138

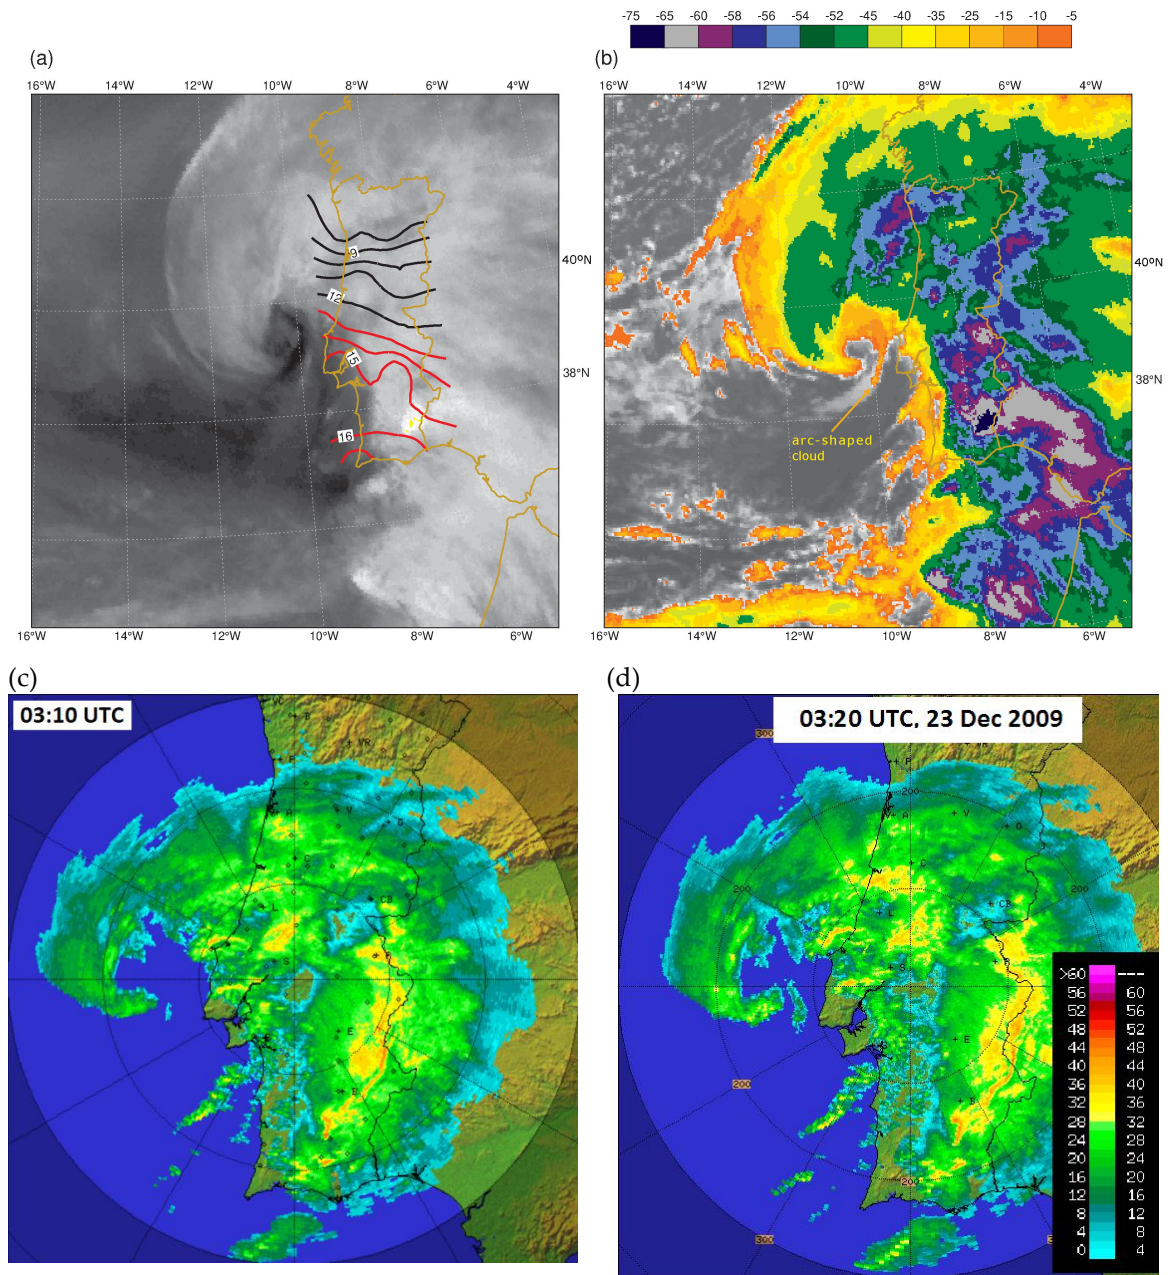

139 **Figure S17.** (a) MSG WV6.2 image and (b) IR10.8 brightness temperature (shaded from -5 to -70°C) at 0310UTC  
 140 on 23/12/2009. MAXZ from CL radar at (c) 0310UTC and (d) 0320UTC on 23/12/2009.



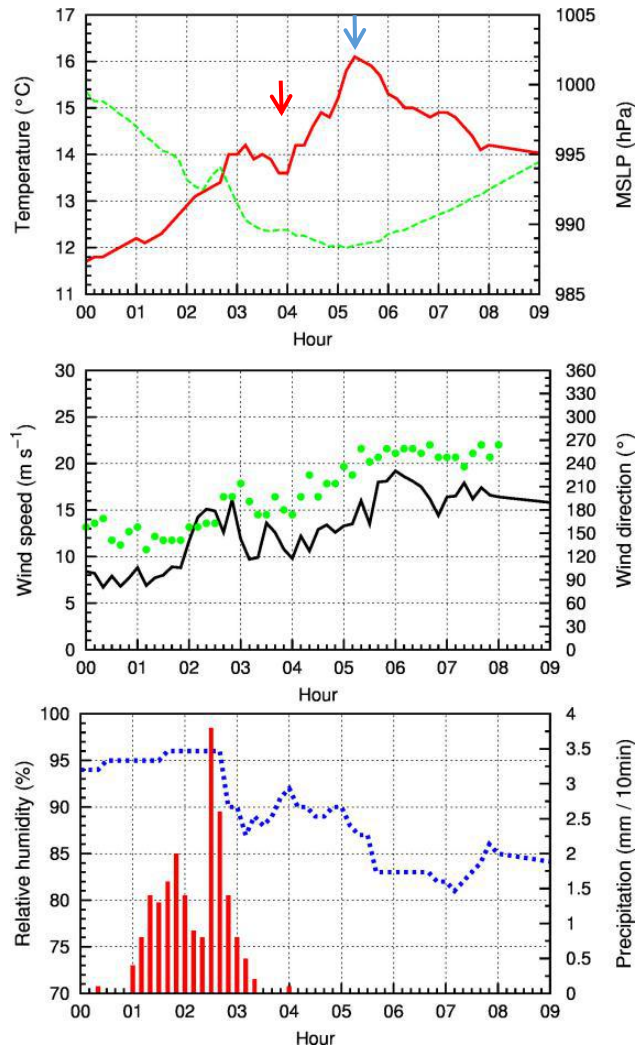

141

142 **Figure S18.** Same as in Figure S16 but for Beja station (see its location in Figure 1d).

143

144

145

146

147

148

149

150

151

152

153

154

155

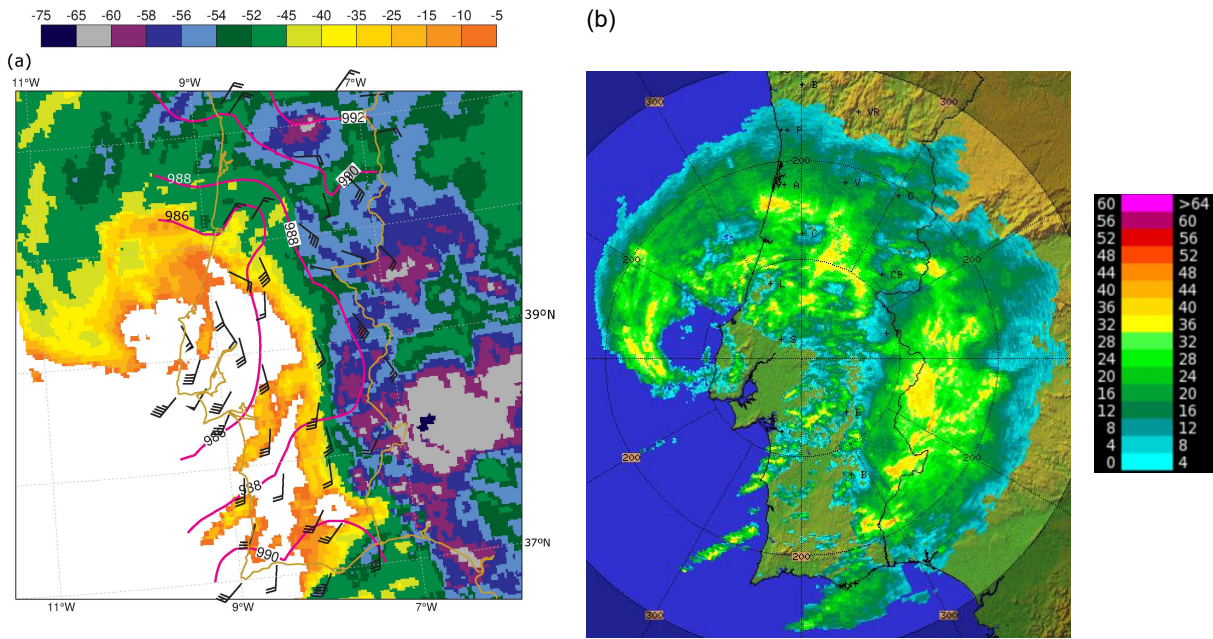

156 **Figure S19** (a) IR10.8 brightness temperature (shaded from -5 to -75°C) superimposed with observations of  
 157 MSLP (2hPa intervals, magenta lines) and wind gust at 10 m (barbs) at 0350UTC. (b) MAXZ from CL radar at  
 158 0350UTC on 23/12/2009.

159

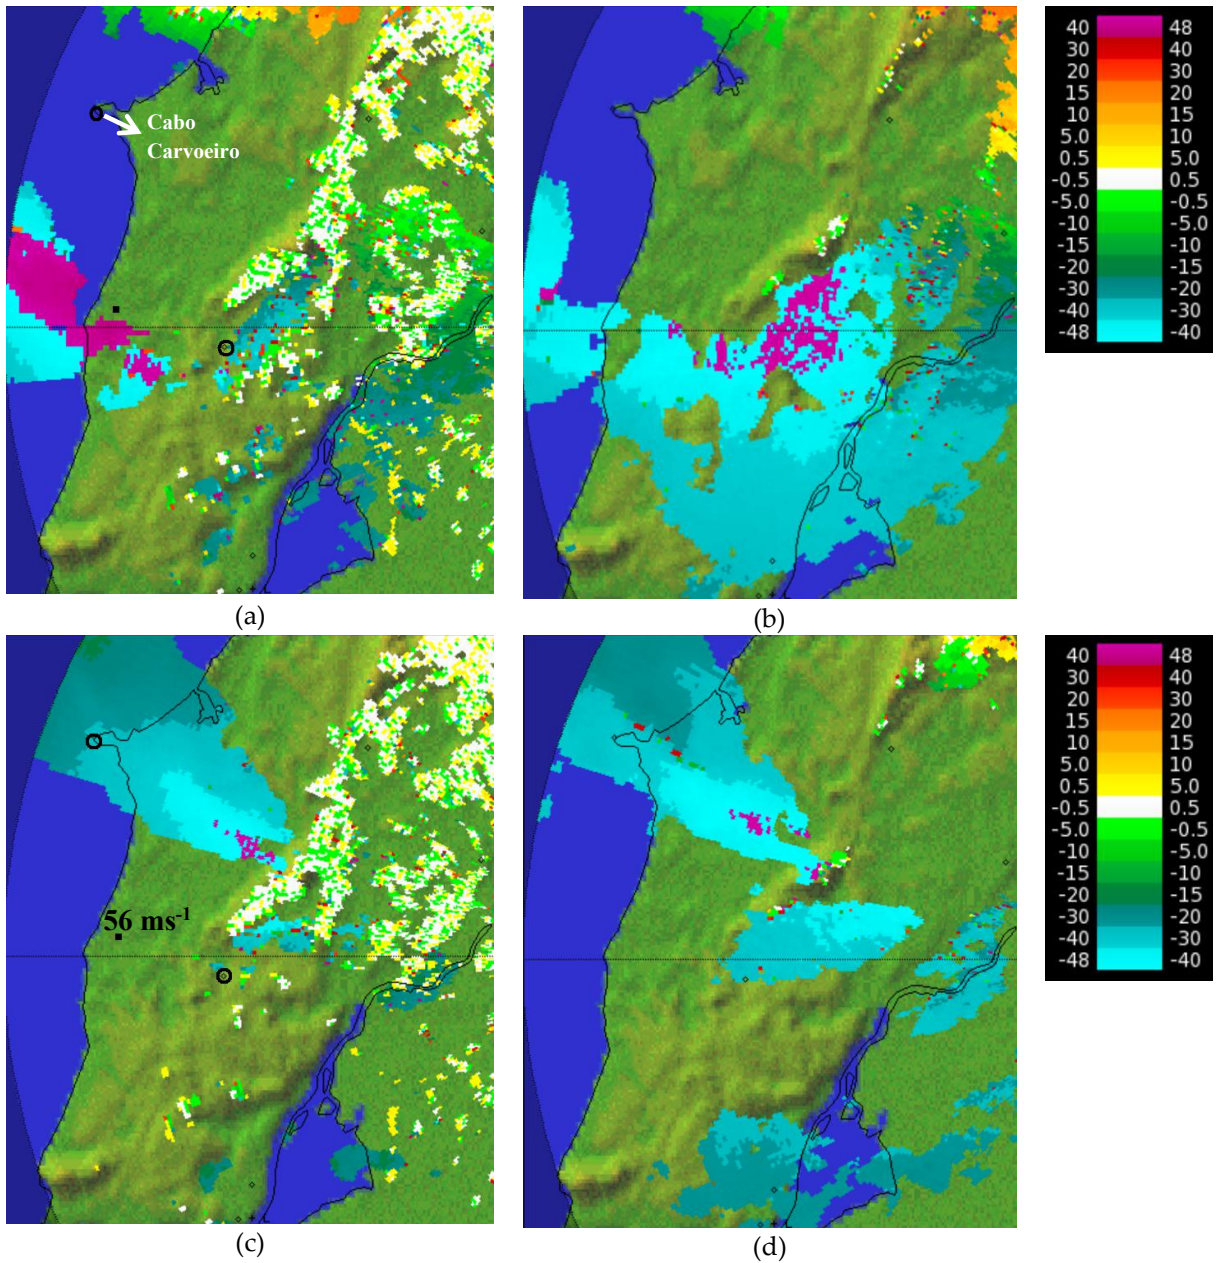

160 **Figure S20.** Doppler velocity (PPI at 0.1° elevation) at (a) 0426 UTC and (c) 0446 UTC, showing the jet streak at  
 161 an altitude of 500-950 m. Doppler velocity (PPI at 1.5° elevation) at (b) 0427 UTC and (d) 0447 UTC, showing  
 162 the jet streak at an altitude of 1400-2500 m, on the 23/12/2009.

163

164

165

166

167

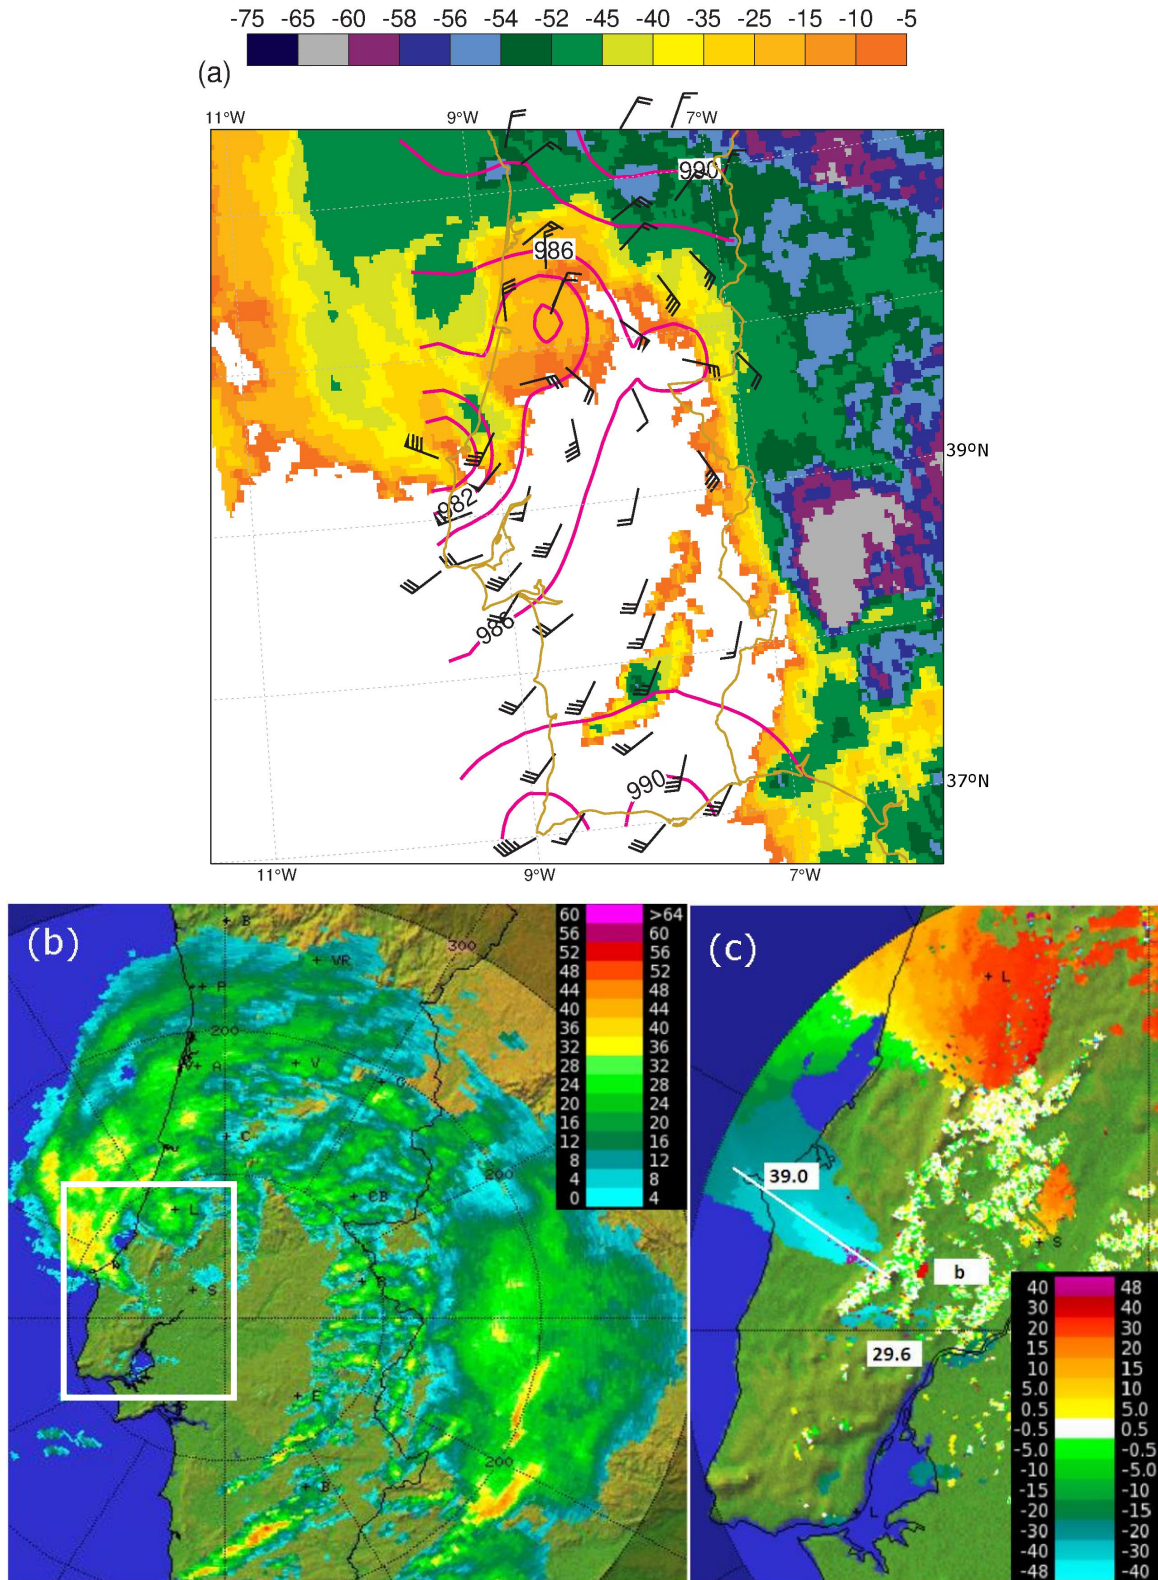

168 **Figure S21.** Observations at 0450UTC on 23/12/2009. (a) IR10.8 brightness temperature (shaded from -5 to -75°C)  
 169 superimposed with observations of MSLP (2hPa intervals, magenta lines) and wind gust at 10 m (barbs) at 0450UTC. (b)  
 170 MAXZ from CL radar. (c) Doppler velocity (PPI at 0.1° elevation) at 0446 UTC, showing the jet streak at an altitude of  
 171 500-950 m. Indicated wind gusts at the time in the represented locations. The approximate location where power towers  
 172 where completely destroyed is marked with “b”.

173

174

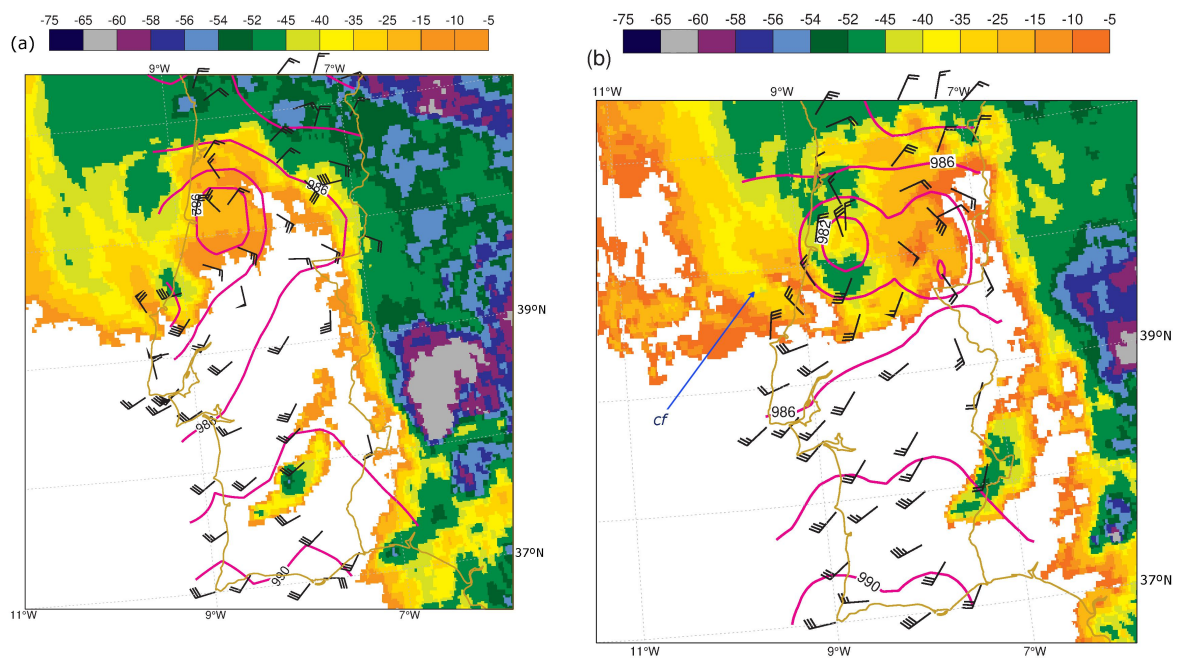

175 **Figure S22.** IR10.8 brightness temperature (shaded from -5 to -75°C) superimposed with observations of MSLP  
 176 (2hPa intervals, magenta lines) and wind gust at 10 m (barbs) at **(a)** 0500UTC and **(b)** 0540UTC on 23/12/2009.  
 177 The dissipating cloud filament (labelled as *cf*) is marked in (b).

178

179

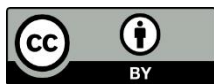

© 2020 by the authors. Submitted for possible open access publication under the terms and conditions of the Creative Commons Attribution (CC BY) license (<http://creativecommons.org/licenses/by/4.0/>).

180
